# Supplementary material for: Synthetic arabinomannan glycolipids and their effects on growth and motility of the Mycobacterium smegmatis
Source: Royal Society of Chemistry journal article supplement (doi:10.1039/b917070g), 2009-12-02
Supplement: b917070g.pdf [file b917070g.pdf]

## Supporting Information

### **Synthetic arabinomannan glycolipids and their effects on growth and motility of the *Mycobacterium smegmatis***

**Kottari Naresh,<sup>a</sup> Binod Kumar Bharati,<sup>b</sup> Prakash Gouda Avaji,<sup>a</sup> Narayanaswamy**

**Jayaraman\*<sup>a</sup> and Dipankar Chatterji\*<sup>b</sup>**

<sup>a</sup> *Department of Organic Chemistry and* <sup>b</sup> *Molecular Biophysics Unit, Indian Institute of Science, Bangalore 560012, India, Fax: 91-80-2360-0529;*

*E-mail: jayaraman@orgchem.iisc.ernet.in*

## Contents

|                                                                                                                        |            |
|------------------------------------------------------------------------------------------------------------------------|------------|
| <sup>1</sup> H and <sup>13</sup> C NMR spectra of protected derivative of <b>1</b>                                     | <b>S3</b>  |
| ES-MS spectrum of protected derivative of <b>1</b> and <sup>1</sup> H NMR spectrum of protected derivative of <b>2</b> | <b>S4</b>  |
| ES-MS and <sup>13</sup> C NMR spectra of protected derivative of <b>2</b>                                              | <b>S5</b>  |
| <sup>1</sup> H and <sup>13</sup> C NMR spectra of <b>1</b>                                                             | <b>S6</b>  |
| ES-MS spectrum of <b>1</b> and <sup>1</sup> H NMR spectrum of <b>2</b>                                                 | <b>S7</b>  |
| <sup>13</sup> C NMR and ES-MS spectra of <b>2</b>                                                                      | <b>S8</b>  |
| <sup>1</sup> H and <sup>13</sup> C NMR spectra of <b>7</b>                                                             | <b>S9</b>  |
| ES-MS spectrum of <b>7</b> and <sup>1</sup> H NMR spectrum of <b>10</b>                                                | <b>S10</b> |
| <sup>13</sup> C NMR and ES-MS spectra of <b>10</b>                                                                     | <b>S11</b> |

|                                                                        |            |
|------------------------------------------------------------------------|------------|
| $^1\text{H}$ and $^{13}\text{C}$ NMR spectra of <b>14</b>              | <b>S12</b> |
| ES-MS spectrum of <b>14</b> and $^1\text{H}$ NMR spectrum of <b>16</b> | <b>S13</b> |
| $^{13}\text{C}$ NMR and ES-MS spectra of <b>16</b>                     | <b>S14</b> |
| $^1\text{H}$ and $^{13}\text{C}$ NMR spectra of <b>19</b>              | <b>S15</b> |
| ES-MS spectrum of <b>19</b>                                            | <b>S16</b> |

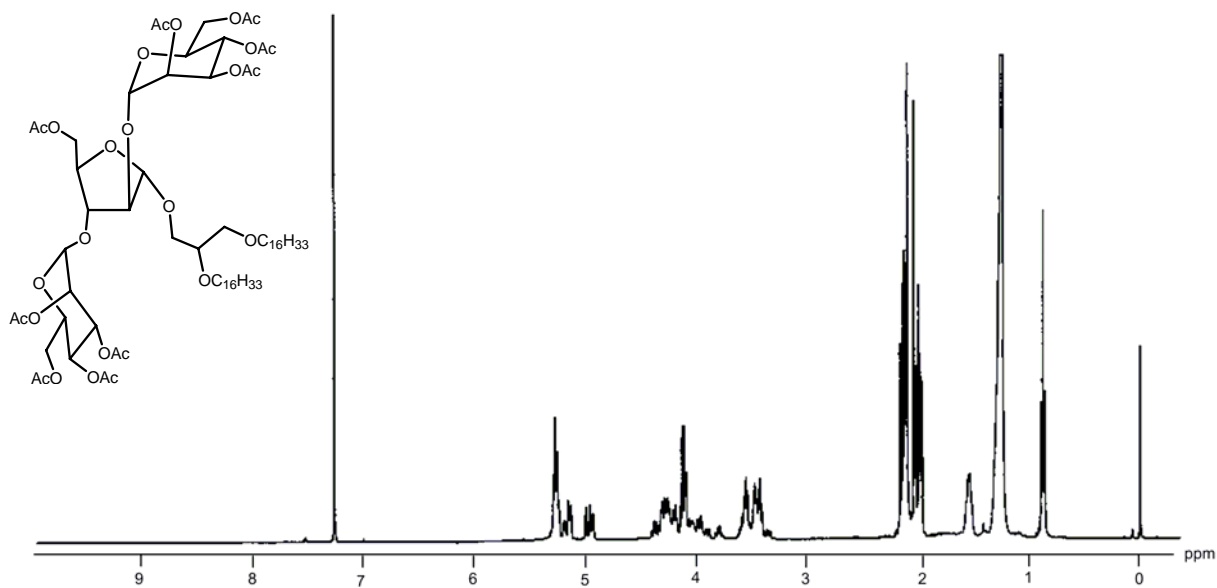

**Figure 1.** <sup>1</sup>H NMR spectrum of the protected derivative of **1** (CDCl<sub>3</sub>, 400 MHz).

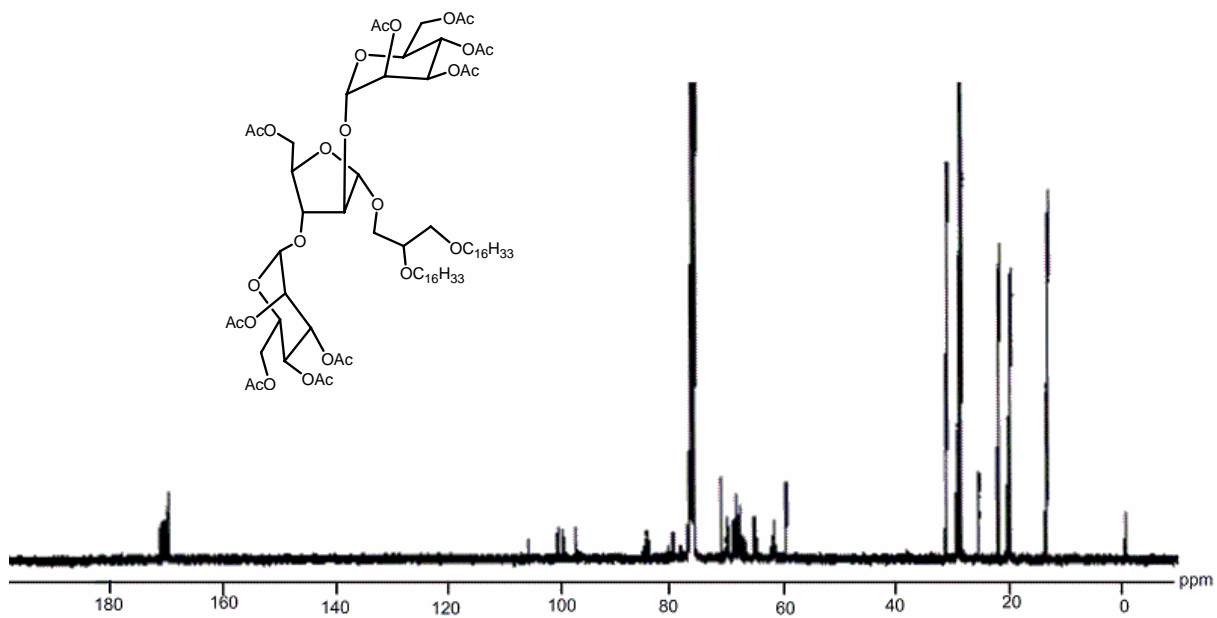

**Figure 2.** <sup>13</sup>C NMR spectrum of the protected derivative of **1** (CDCl<sub>3</sub>, 100 MHz).

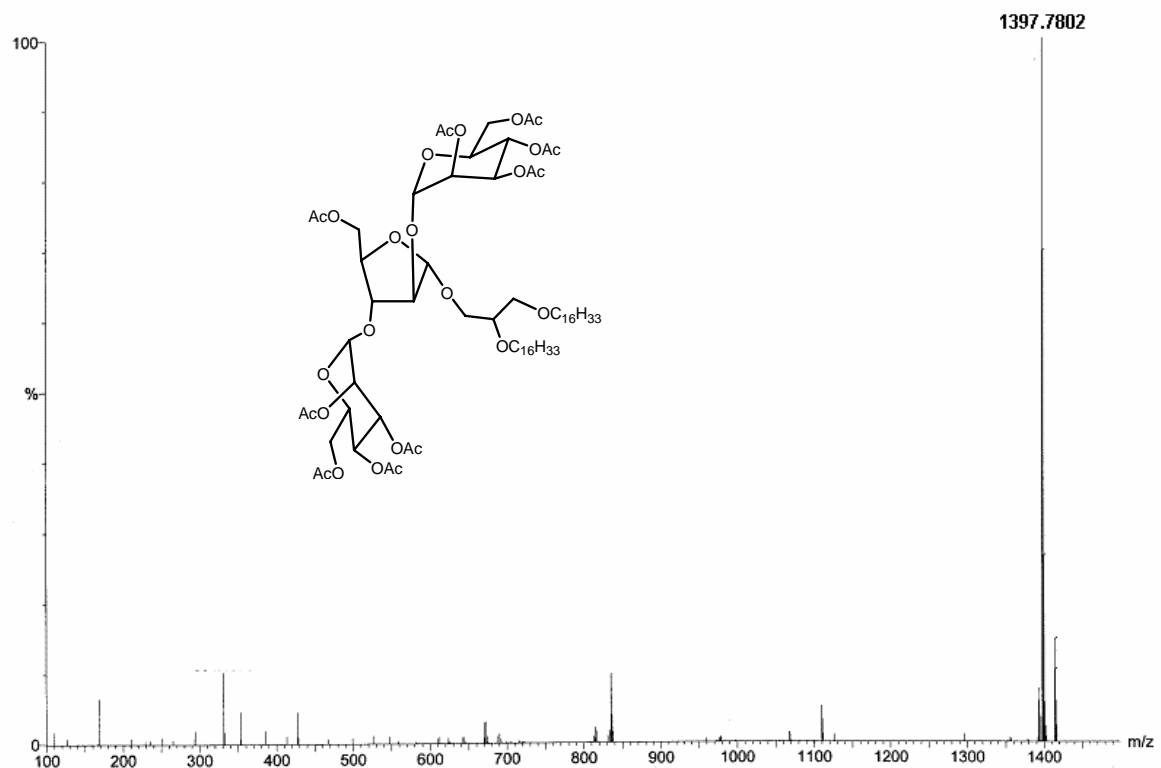

**Figure 3.** ES-MS spectrum of the protected derivative of **1** (Calc. mass: 1397.7809 (M+Na)).

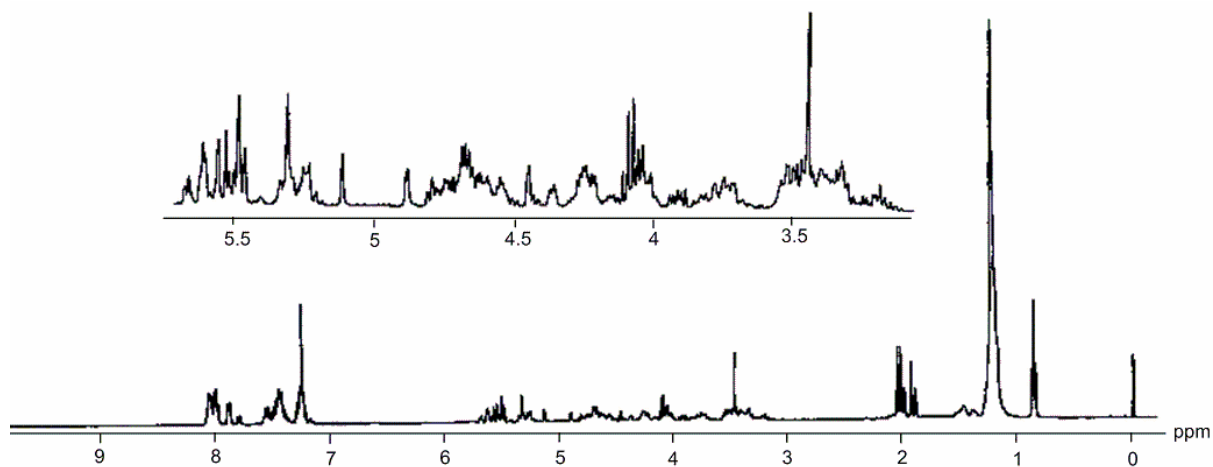

**Figure 4.** <sup>1</sup>H NMR spectrum of the protected derivative of **2** (CDCl<sub>3</sub>, 400 MHz).

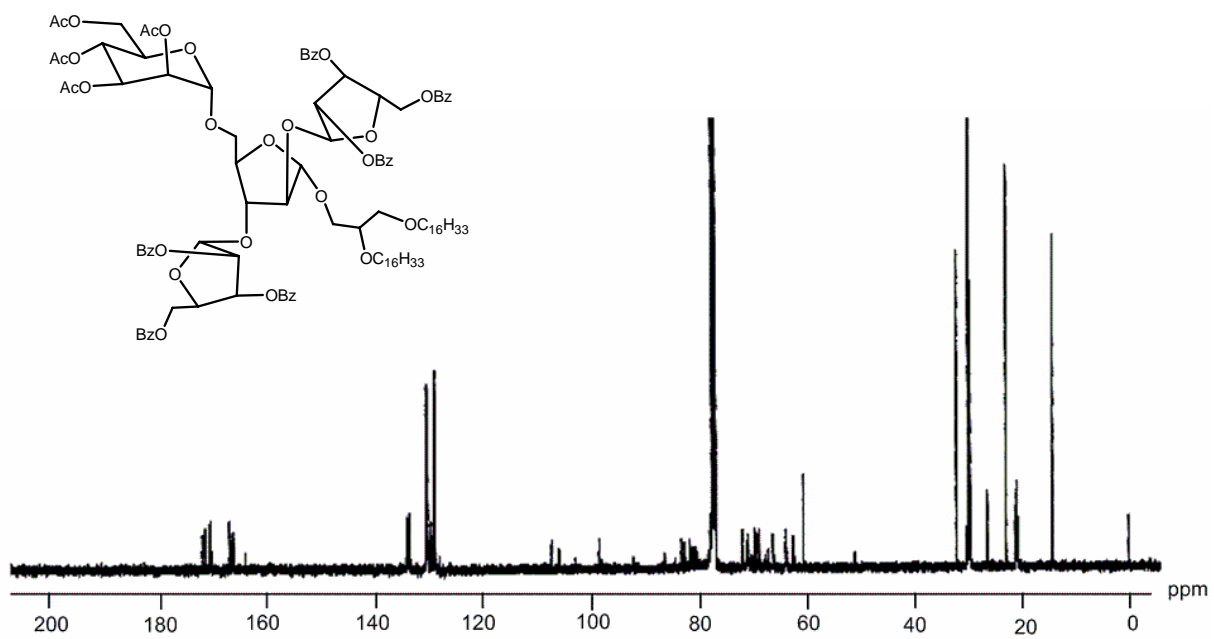

**Figure 5.**  $^{13}\text{C}$  NMR spectrum of protected derivative of **2** ( $\text{CDCl}_3$ , 100 MHz).

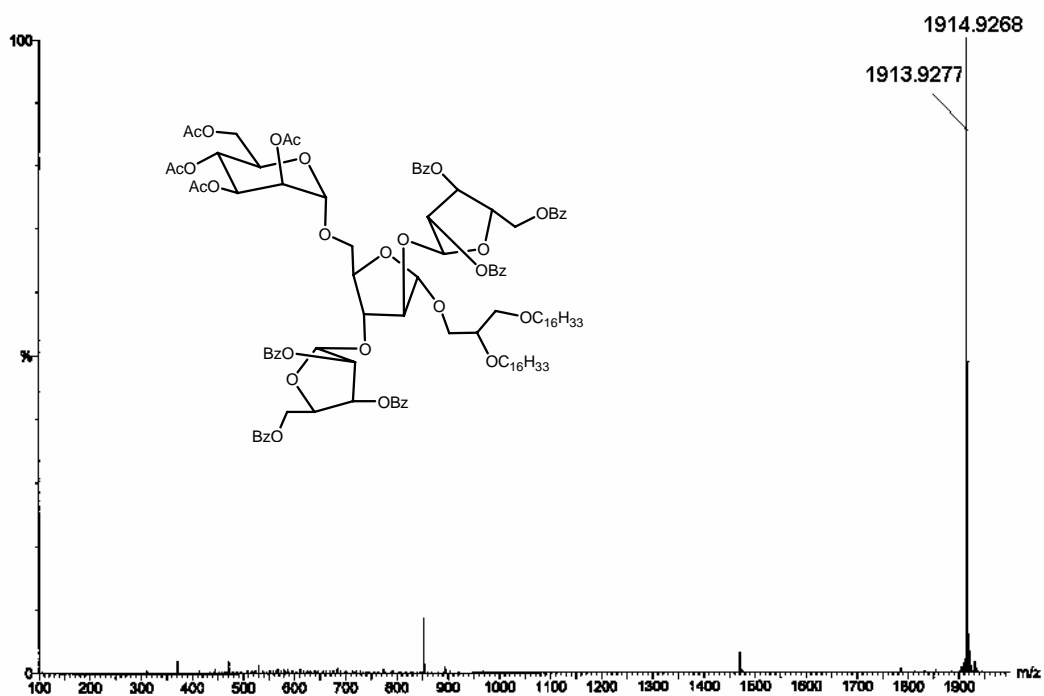

**Figure 6.** ES-MS spectrum of the protected derivative of **2** (Calc. mass: 1913.9171 ( $\text{M}+\text{Na}$ )).

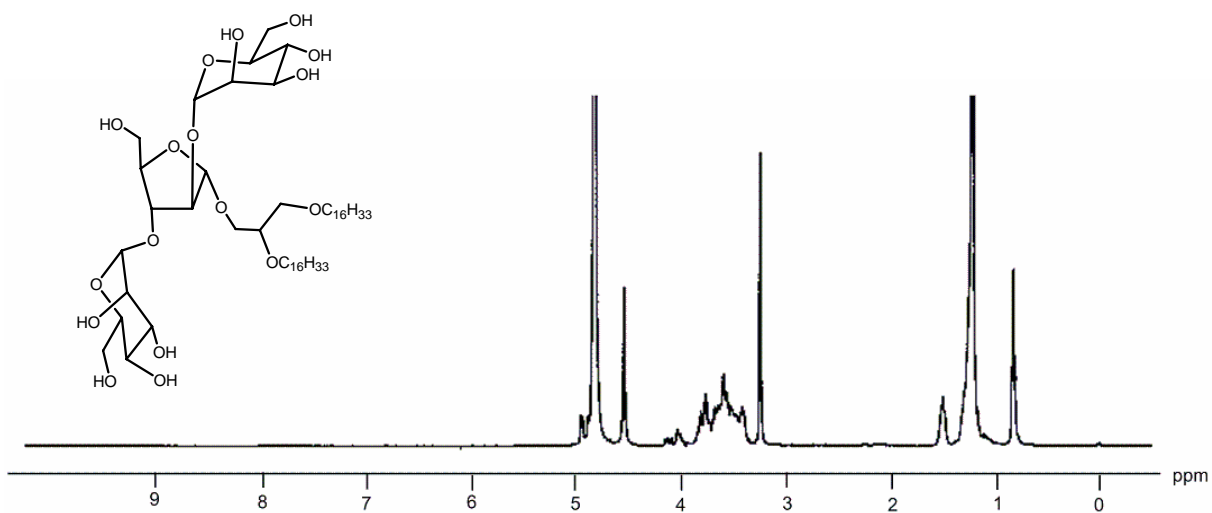

Figure 7.  $^1\text{H}$  NMR spectrum of **1** ( $\text{CD}_3\text{OD}$ , 400 MHz).

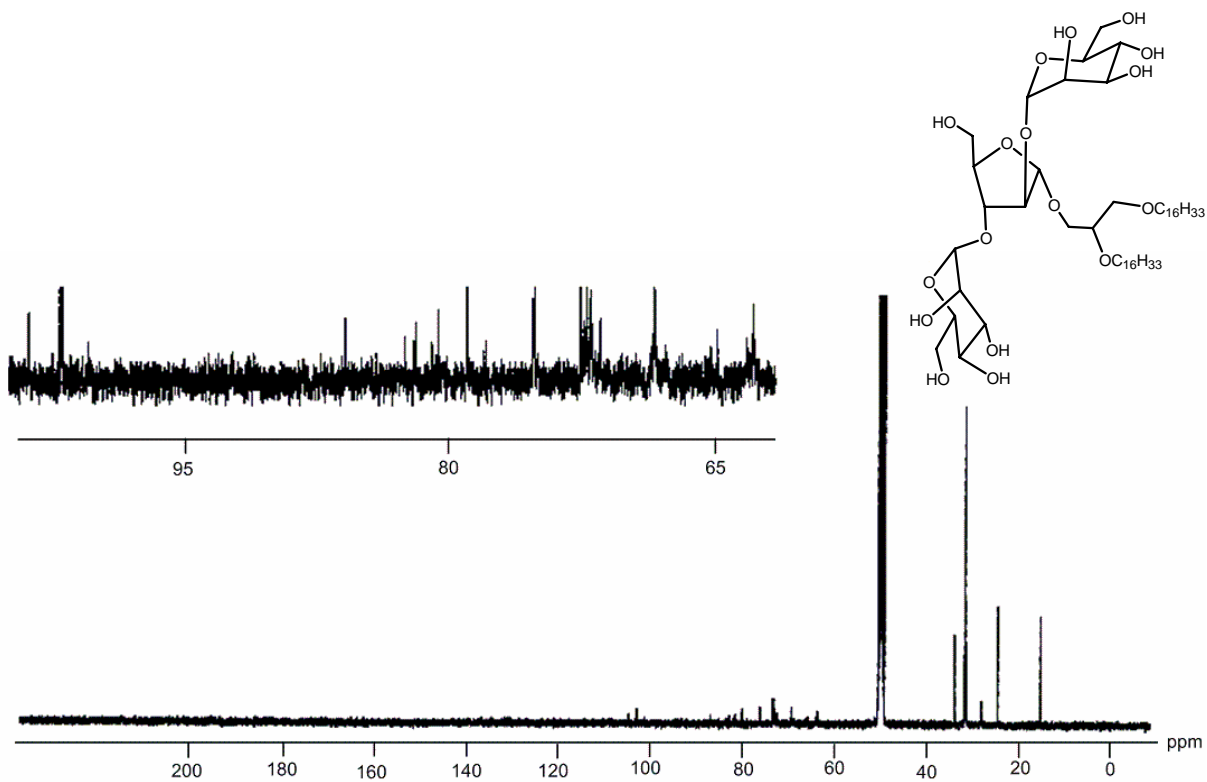

Figure 8.  $^{13}\text{C}$  NMR spectrum of **1** ( $\text{CD}_3\text{OD}$ , 100 MHz).

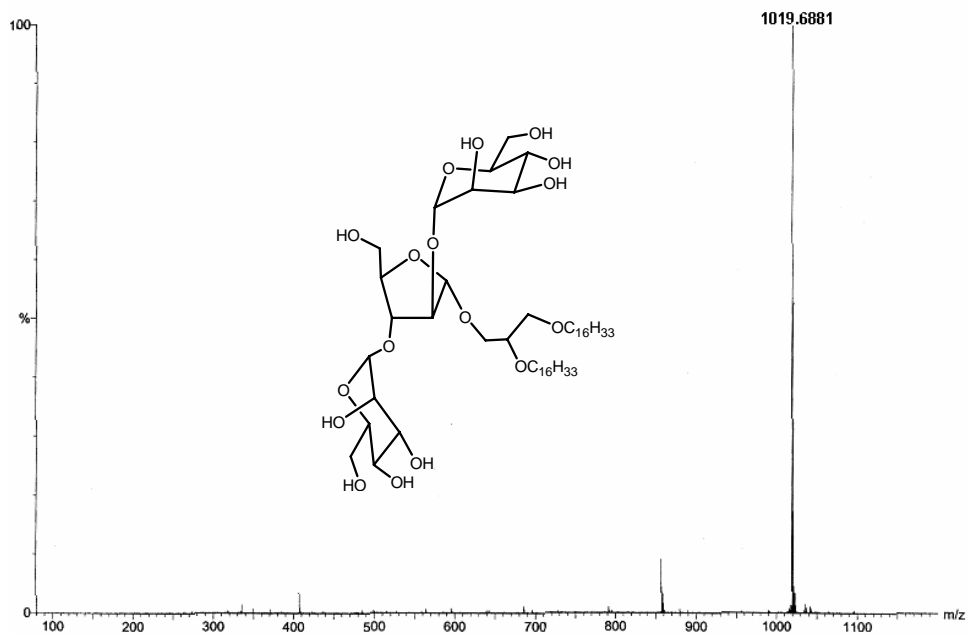

**Figure 9.** ES-MS spectrum of **1** (Calc. mass: 1019.6858 (M+Na)).

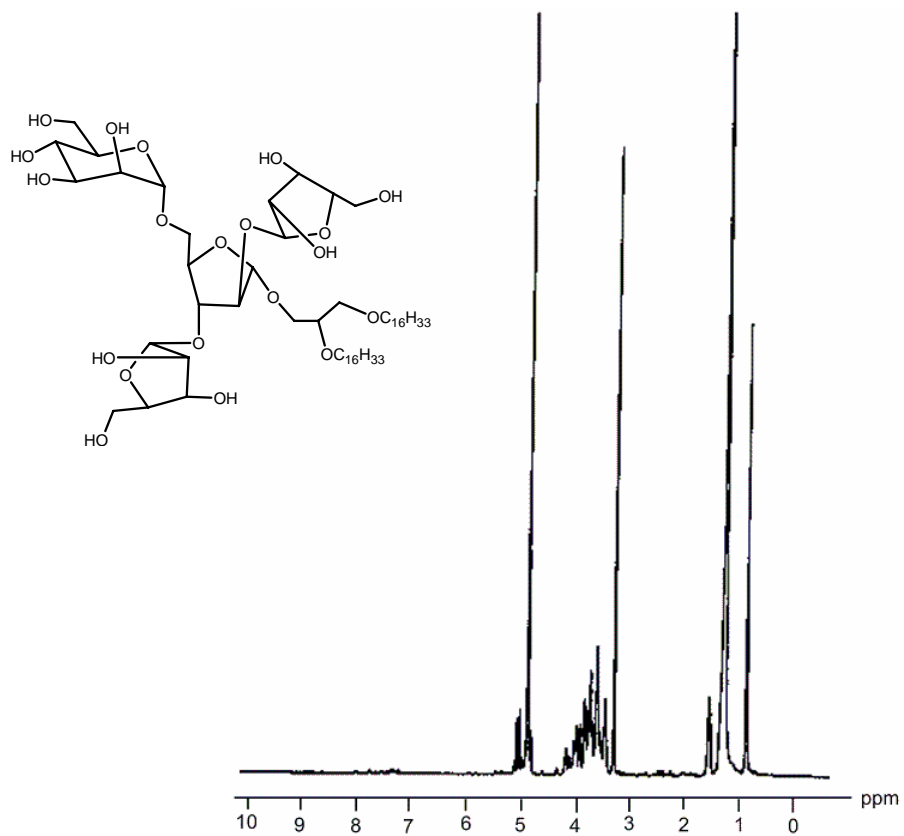

**Figure 10.** <sup>1</sup>H NMR spectrum of **2** (CD<sub>3</sub>OD, 400 MHz).

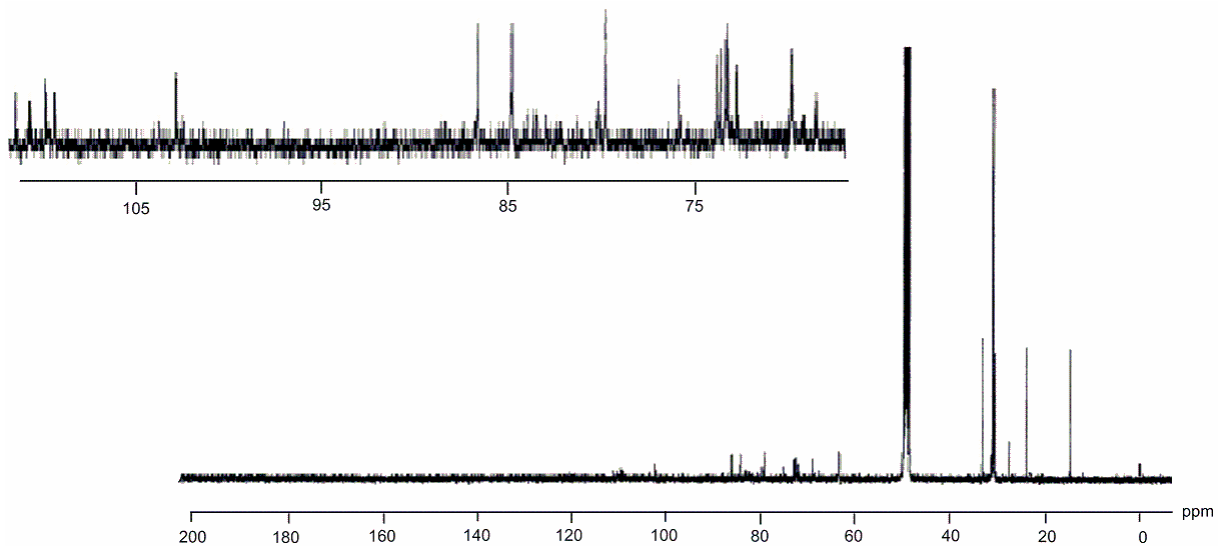

**Figure 11.**  $^{13}\text{C}$  NMR spectrum of **2** ( $\text{CD}_3\text{OD}$ , 100 MHz).

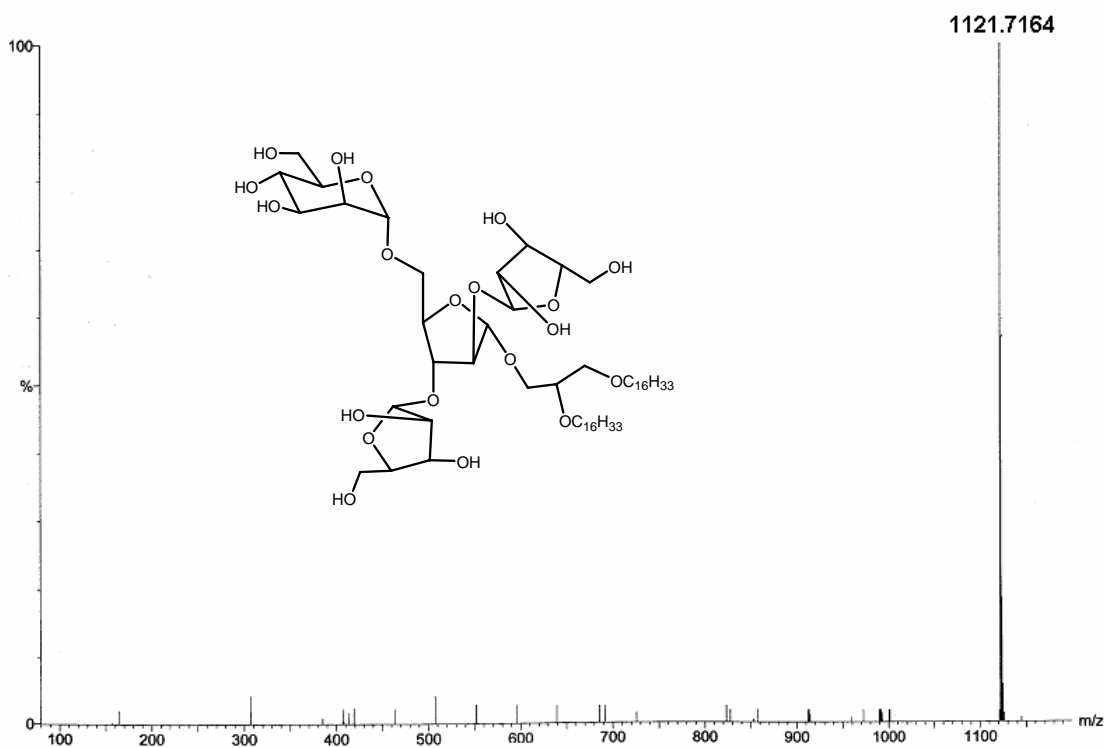

**Figure 12.** ES-MS spectrum of **2** (Calc. mass: 1121.7175 ( $\text{M}+\text{Na}$ )).



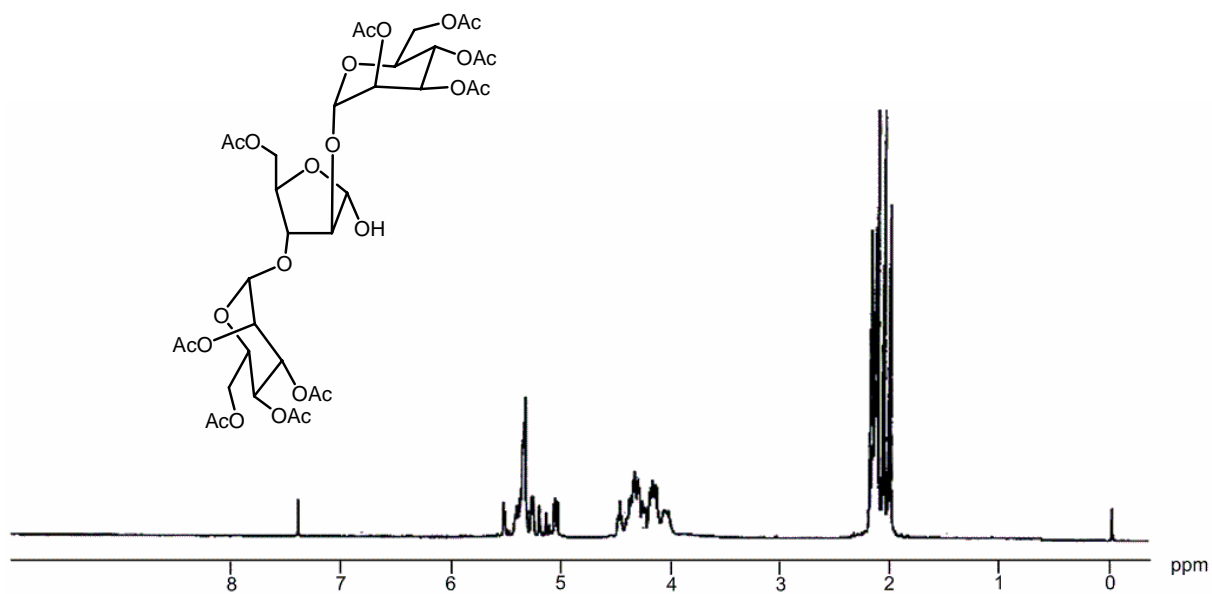

**Figure 13.** <sup>1</sup>H NMR spectrum of **7** (CDCl<sub>3</sub>, 400 MHz).

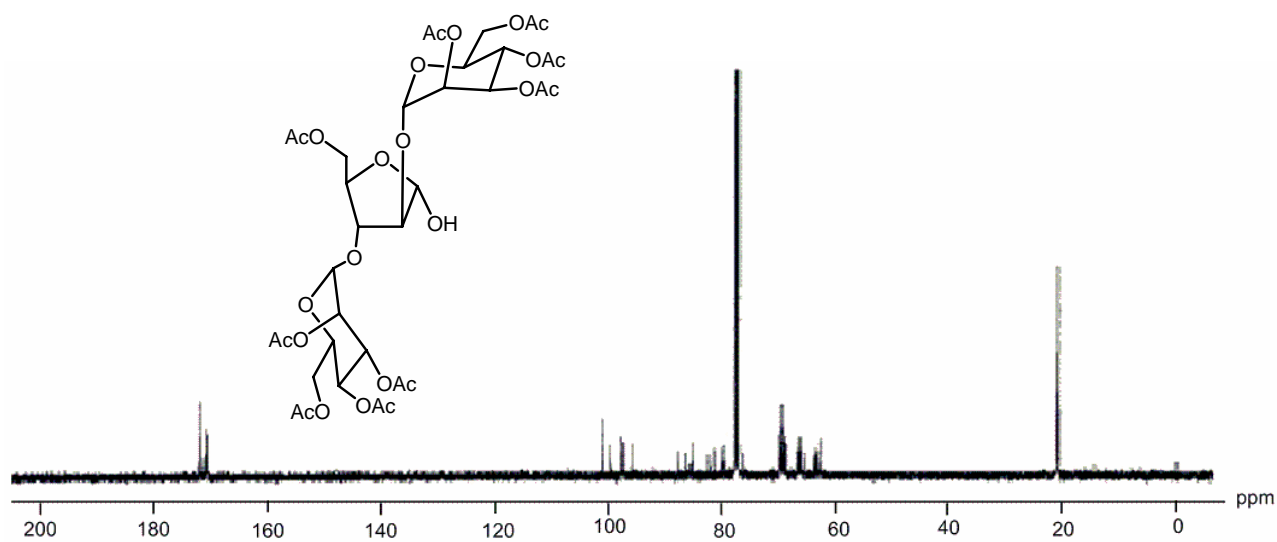

**Figure 14.** <sup>13</sup>C NMR spectrum of **7** (CDCl<sub>3</sub>, 100 MHz).

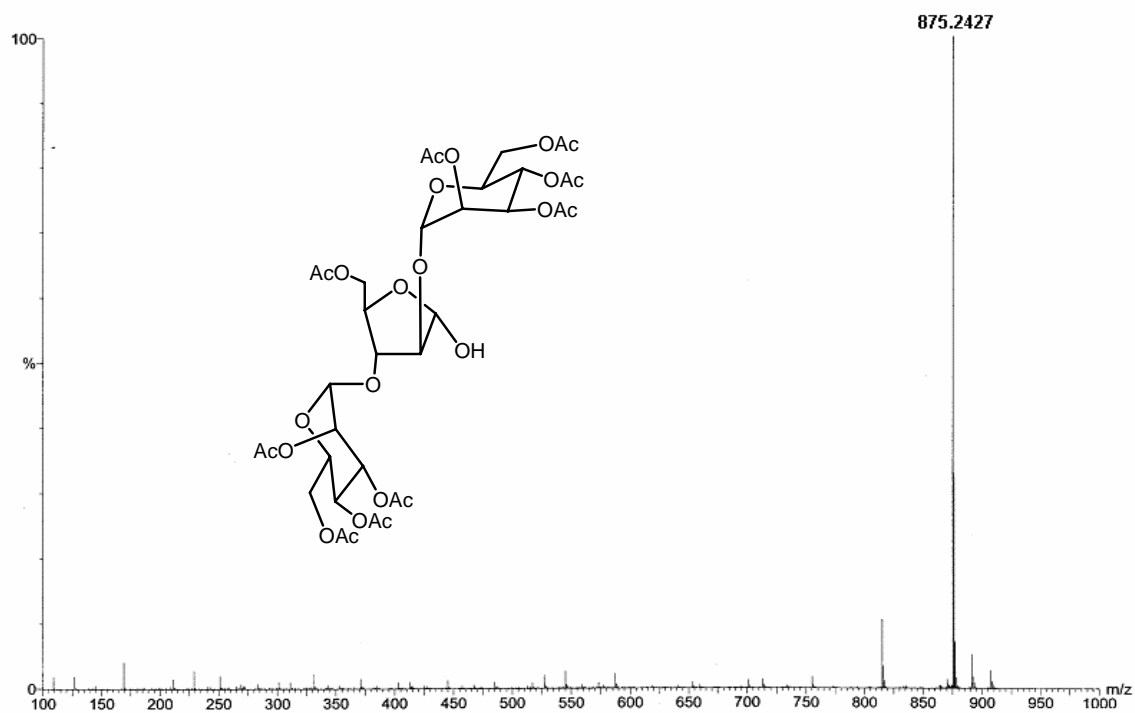

**Figure 15.** ES-MS spectrum of **7** (Calc. mass: 875.2433 (M+Na)).

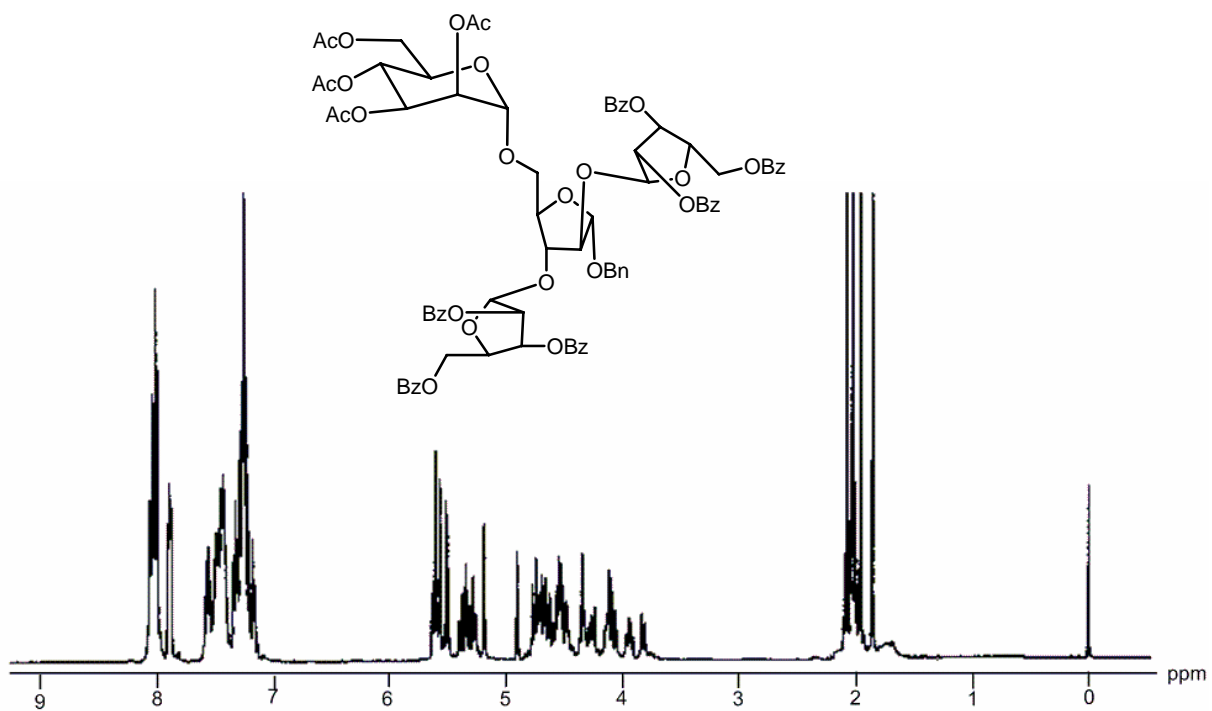

**Figure 16.**  $^1\text{H}$  NMR spectrum of **10** ( $\text{CDCl}_3$ , 400 MHz).

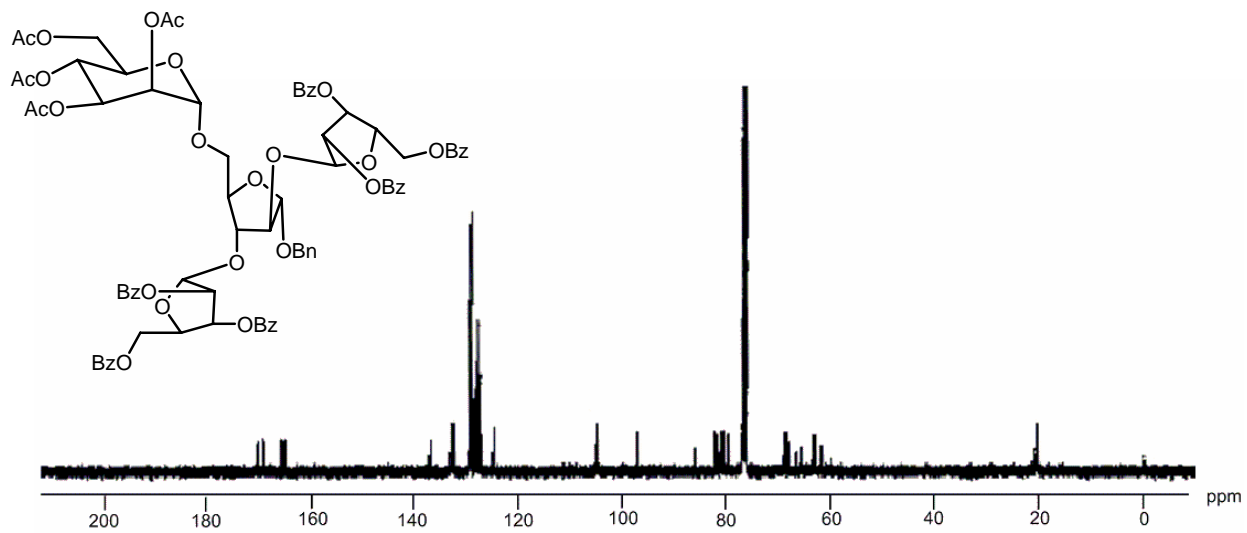

**Figure 17.**  $^{13}\text{C}$  NMR spectrum of **10** ( $\text{CDCl}_3$ , 100 MHz).

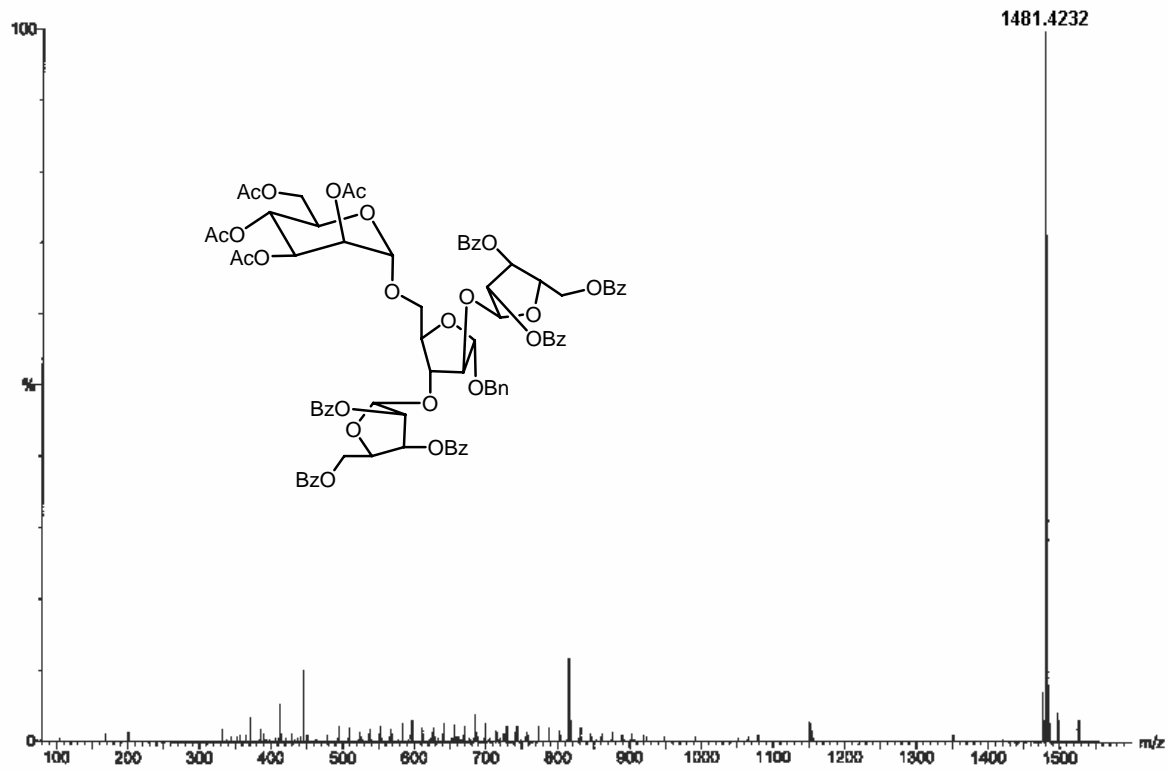

**Figure 18.** ES-MS spectrum of **10** (Calc. mass: 1481.4264 ( $\text{M}+\text{Na}$ )).

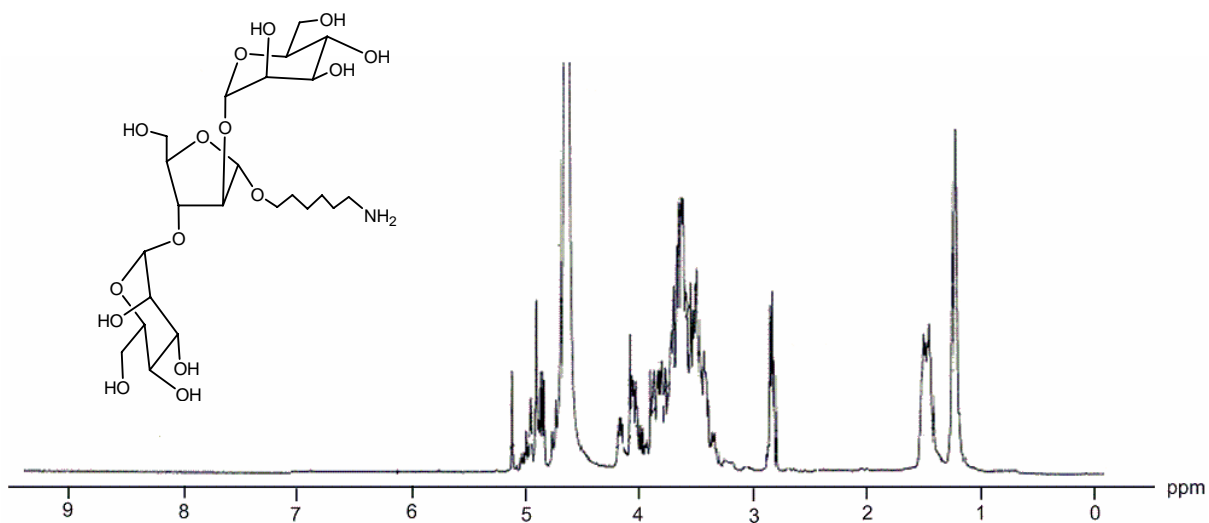

**Figure 19.**  $^1\text{H}$  NMR spectrum of **14** ( $\text{D}_2\text{O}$ , 400 MHz).

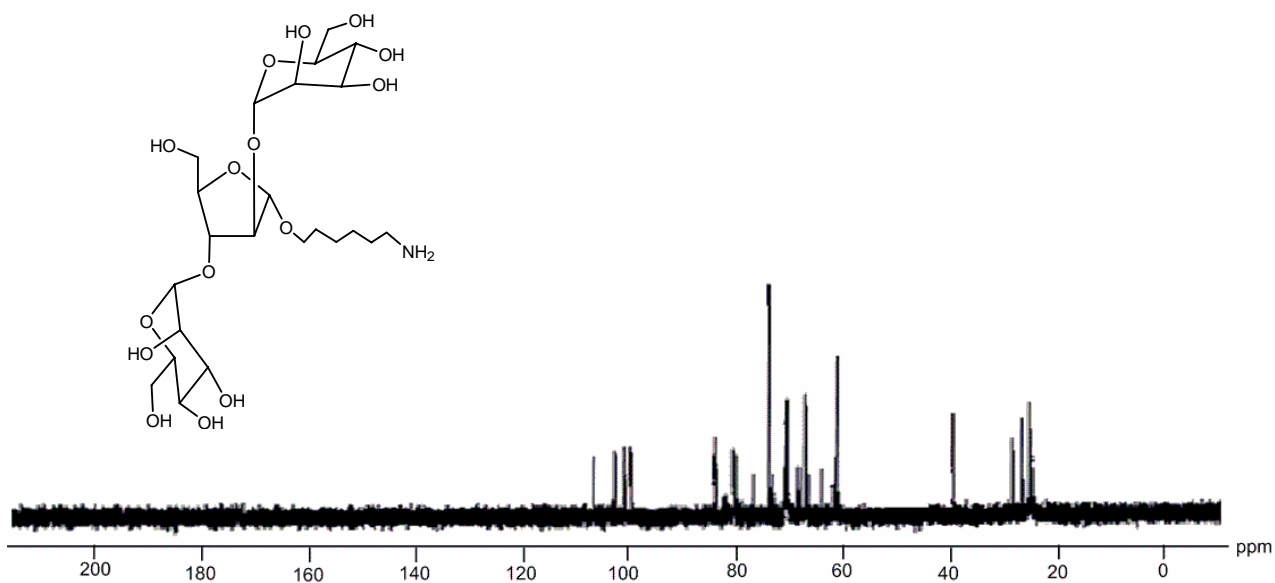

**Figure 20.**  $^{13}\text{C}$  NMR spectrum of **14** ( $\text{D}_2\text{O}$ , 100 MHz).

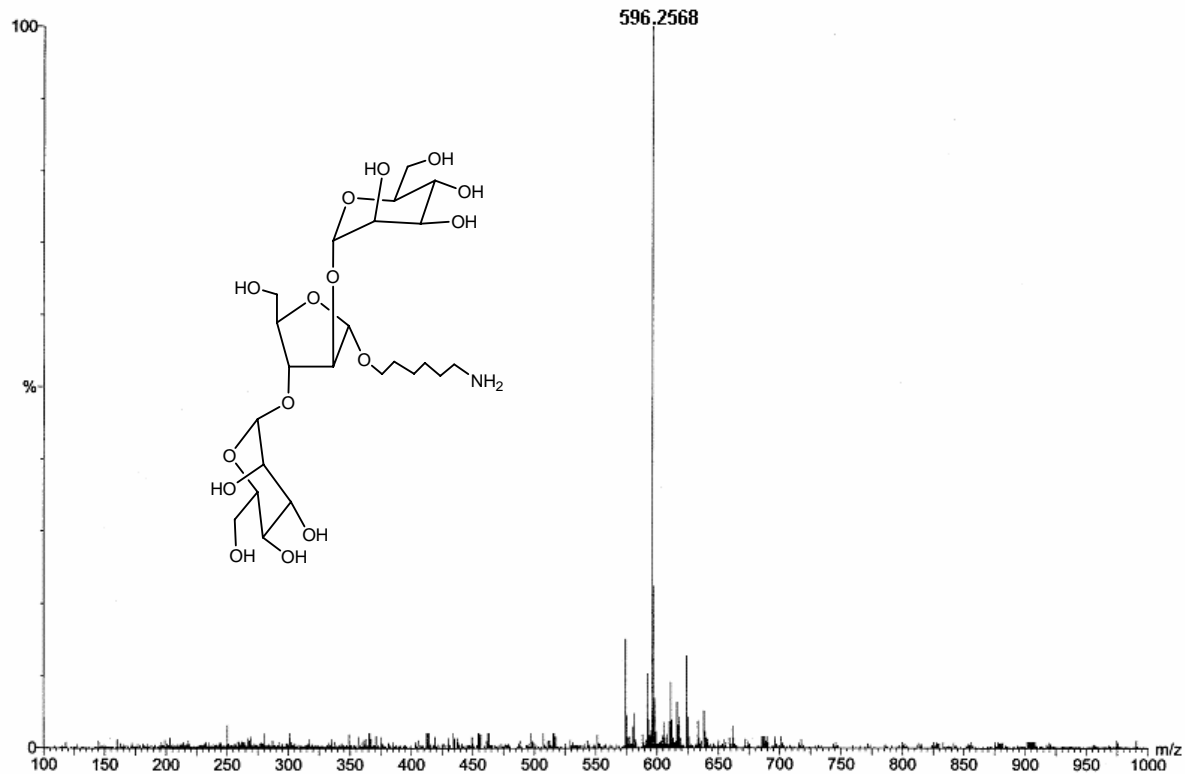

**Figure 21.** ES-MS spectrum of **14** (Calc. mass: 596.2530 (M+Na)).

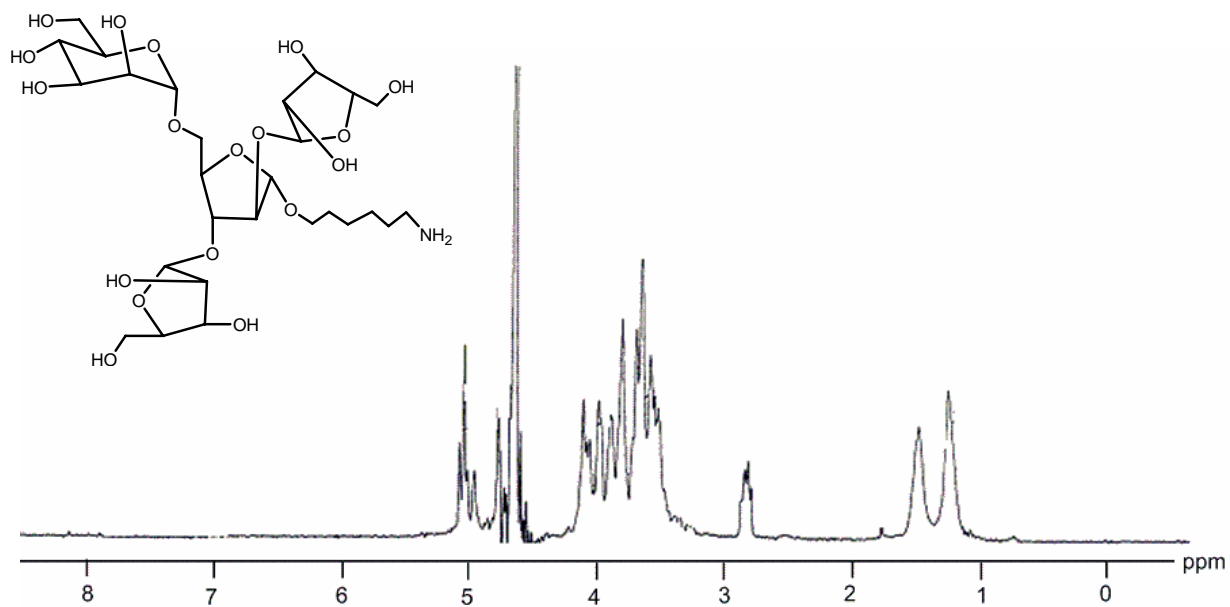

**Figure 22.** <sup>1</sup>H NMR spectrum of **16** (D<sub>2</sub>O, 400 MHz).

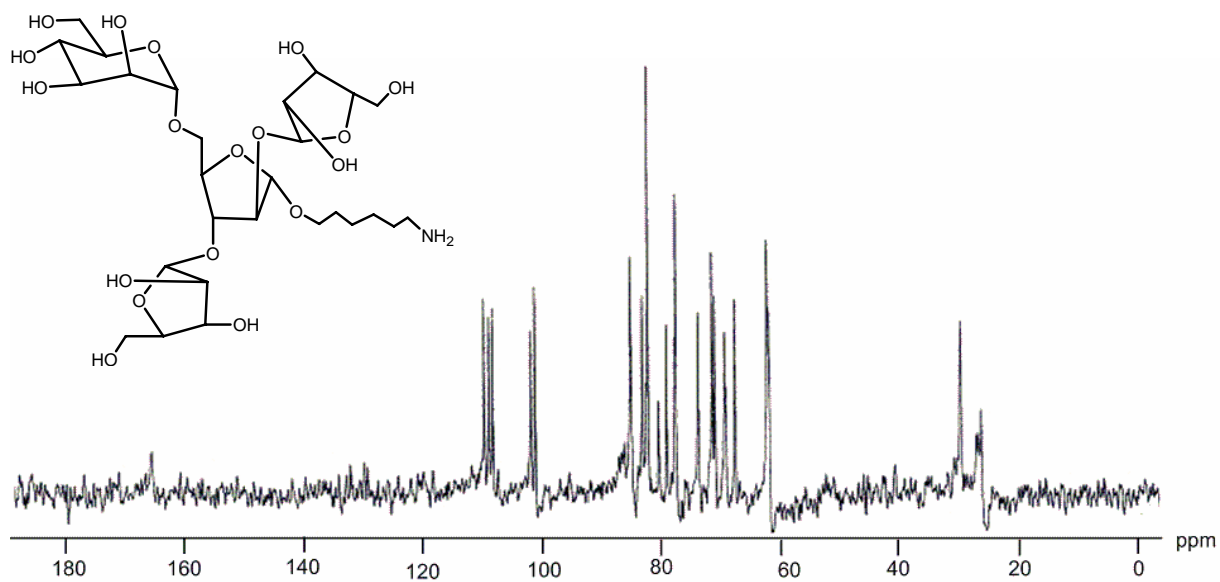

**Figure 23.**  $^{13}\text{C}$  NMR spectrum of **16** ( $\text{D}_2\text{O}$ , 100 MHz).

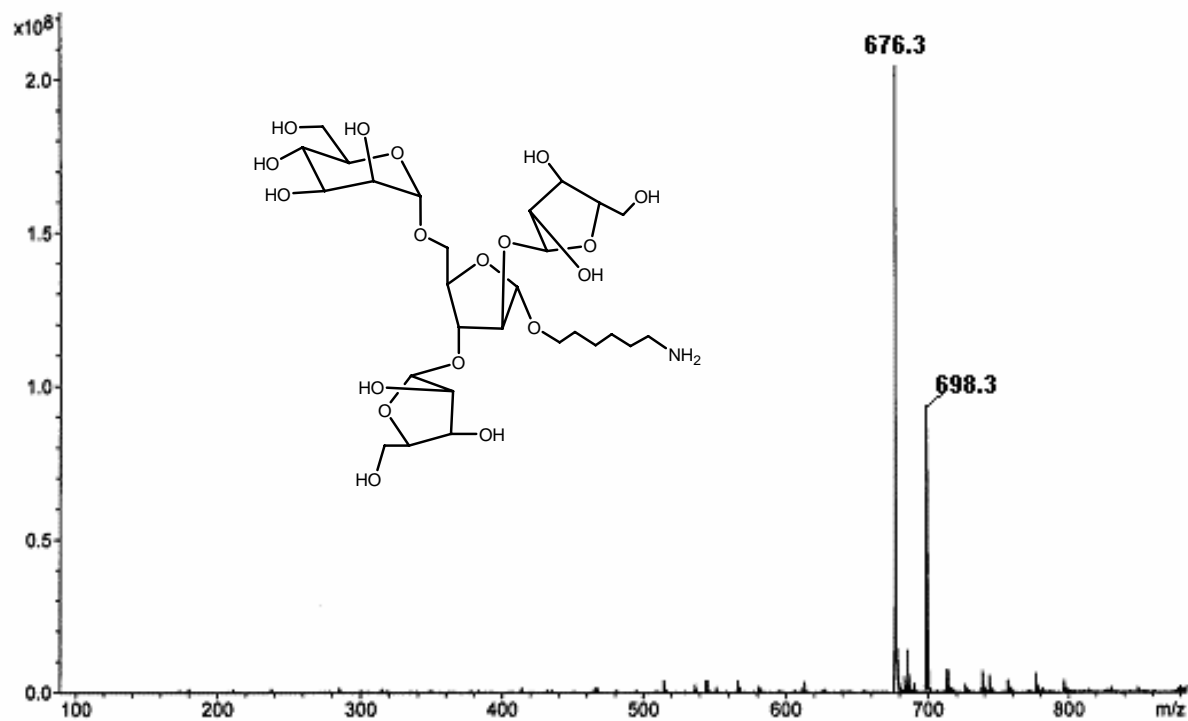

**Figure 24.** ES-MS spectrum of **16** (Calc. mass: 676.3 ( $\text{M}+\text{H}$ )).

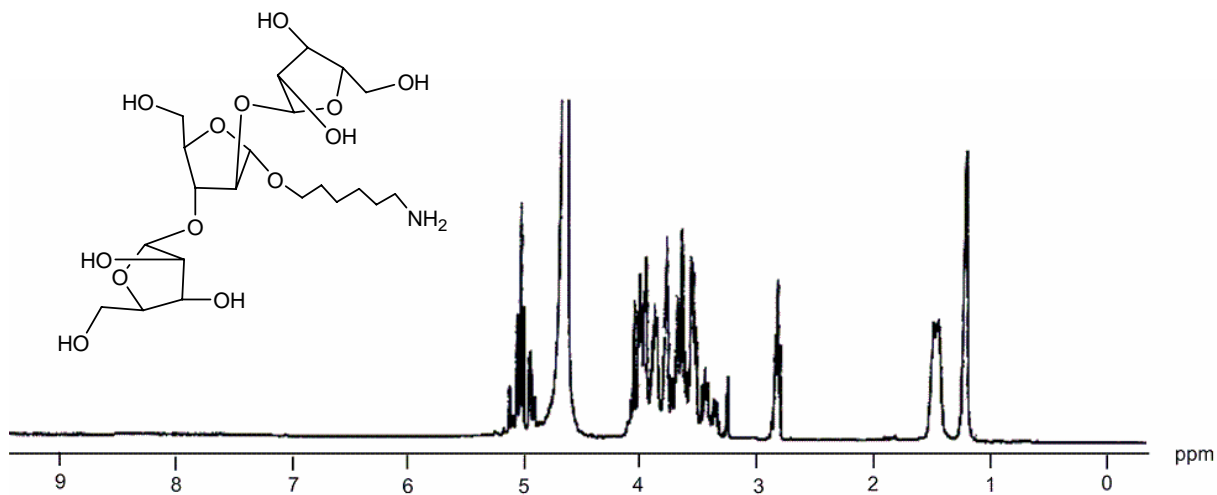

**Figure 25.**  $^1\text{H}$  NMR spectrum of **19** ( $\text{D}_2\text{O}$ , 400 MHz).

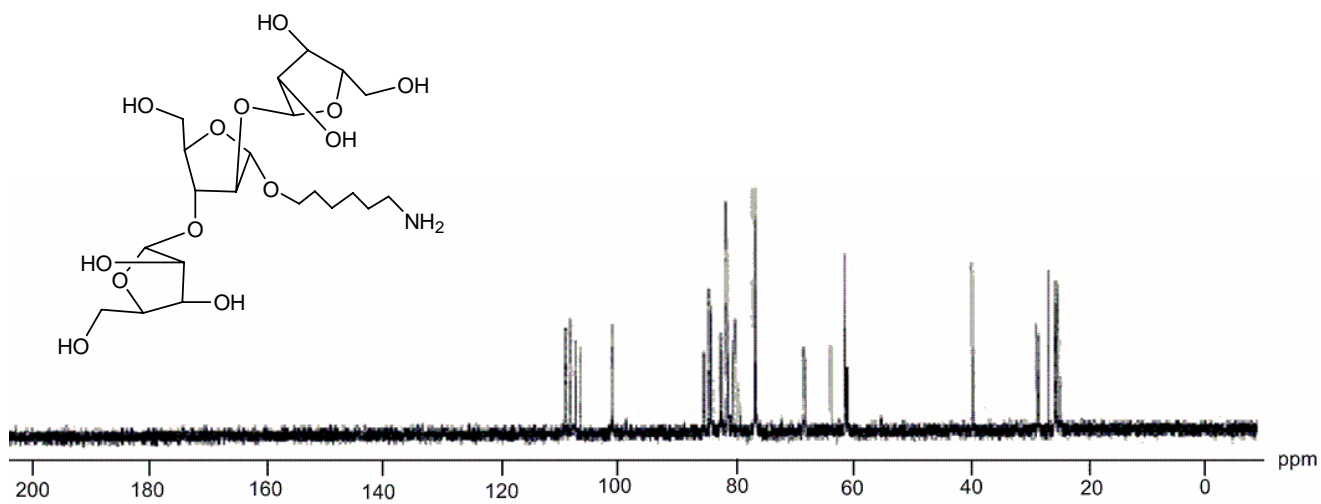

**Figure 26.**  $^{13}\text{C}$  NMR spectrum of **19** ( $\text{D}_2\text{O}$ , 100 MHz).

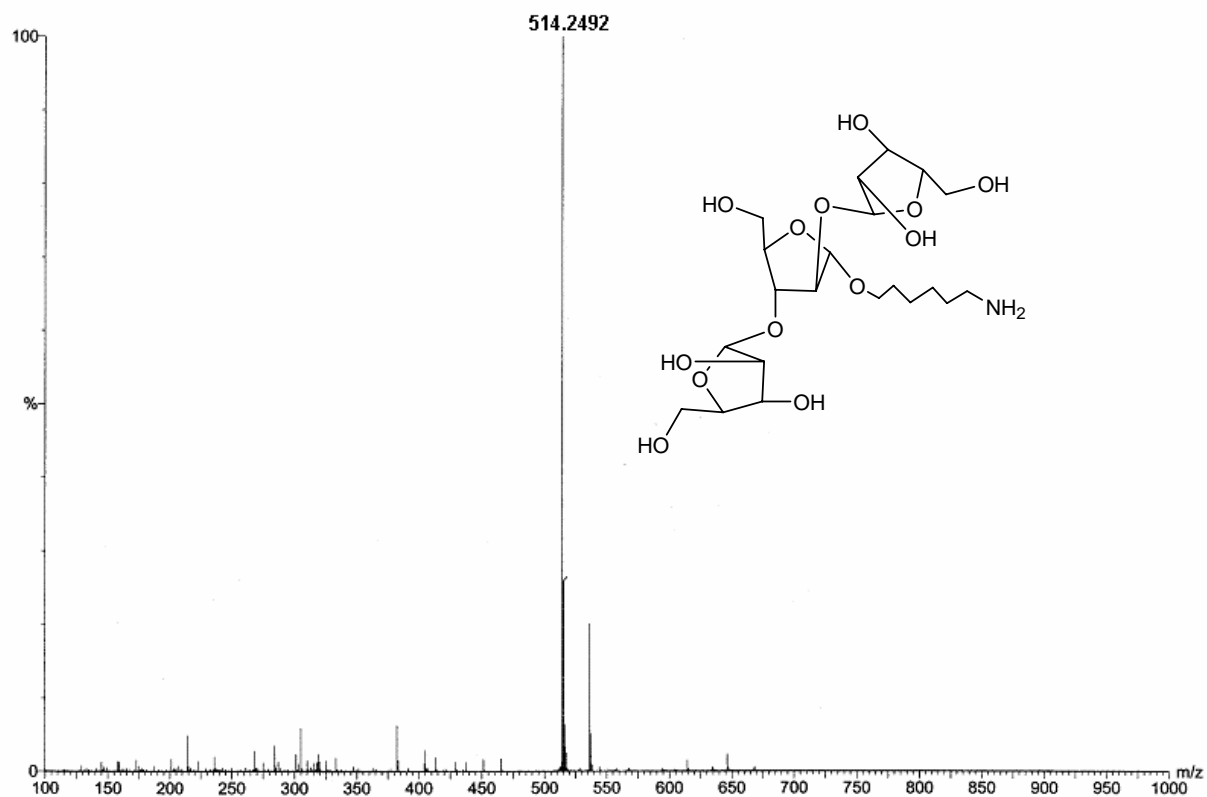

**Figure 27.** ES-MS spectrum of **19** (Calc. mass: 514.2499 ( $M+H$ )).
